# Supplementary material for: HIV-1-Associated Left Ventricular Cardiac Dysfunction in Humanized Mice
Source: PubMed Central journal article supplement (PMC7297773; doi:10.1038/s41598-020-65943-9), 2020-06-16
Supplement: 41598_2020_65943_MOESM1_ESM.pdf [file 41598_2020_65943_MOESM1_ESM.pdf]

# HIV-1-Associated Left Ventricular Cardiac Deficits in Humanized Mice

## SUPPLEMENTAL MATERIALS

Prasanta K Dash<sup>1#</sup>, Fadhel A. Alomar<sup>4#</sup>, Bryan T. Hackfort<sup>2</sup>, Hang Su<sup>1</sup>, Amy Conaway<sup>1</sup>, Larisa Poluektova<sup>1</sup>, Howard E. Gendelman<sup>1</sup>, Santhi Gorantla<sup>1\*</sup> and Keshore R. Bidasee<sup>1, 3, 5\*</sup>

Departments of <sup>1</sup>Pharmacology and Experimental Neuroscience, <sup>2</sup>Cellular and Integrative Physiology, and <sup>3</sup>Environment and Occupational Health, University of Nebraska Medical Center, Omaha, NE 68198, <sup>4</sup>Department of Pharmacology, College of Clinical Pharmacy, Imam Abdulrahman bin Faisal University, Kingdom of Saudi Arabia and <sup>5</sup>Nebraska Redox Biology Center, Lincoln NE.

# Equal Contributions made

### \* Corresponding authors

Santhi Gorantla, Ph.D. (Shared correspondence)

Department of Pharmacology and Experimental Neuroscience, 985800 Nebraska Medical Center, Durham Research Center, DRC 8020, Tel: (402) 559-8754; Fax: (402) 559-7495, email: [sgorantla@unmc.edu](mailto:sgorantla@unmc.edu)

### Keshore R. Bidasee, Ph.D. (Manuscript Submission, Shared correspondence)

Department of Pharmacology and Experimental Neuroscience, 985800 Nebraska Medical Center, Durham Research Center, DRC 3047, Omaha, NE, USA. Tel: (402) 559-9018; Fax: (402) 559-7495, email: [kbidasee@unmc.edu](mailto:kbidasee@unmc.edu)

**Supplemental Table 1: Characteristics of Humanized mice used in the study**

| <b>Mice Numbers</b> | <b>Gender</b> | <b>Cord blood sample*</b> | <b>% Human CD45+ cells in peripheral blood</b> | <b>Experimental group</b> | <b>Plasma Viral load (HIV-1 RNA copies/ml)</b> |
|---------------------|---------------|---------------------------|------------------------------------------------|---------------------------|------------------------------------------------|
| 2823                | F             | A                         | 14.4                                           | Control                   | -                                              |
| 2825                | F             | A                         | 23.7                                           | Control                   | -                                              |
| 2841                | F             | A                         | 21.4                                           | Control                   | -                                              |
| 2842                | F             | A                         | 16.4                                           | HIV                       | 45200                                          |
| 2860                | M             | B                         | 54.9                                           | HIV                       | 42600                                          |
| 2866                | F             | B                         | 48.8                                           | Control                   | -                                              |
| 2867                | F             | B                         | 39.6                                           | HIV                       | 209000                                         |
| 2868                | F             | B                         | 52.7                                           | HIV                       | 8000                                           |
| 2869                | F             | B                         | 44.4                                           | HIV                       | 209000                                         |
| 2870                | F             | C                         | 28.5                                           | HIV                       | 60200                                          |
| 2872                | F             | C                         | 32.7                                           | HIV                       | 204000                                         |
| 2873                | F             | C                         | 31.8                                           | HIV                       | 434000                                         |
| 2874                | F             | C                         | 27.8                                           | HIV                       | 210000                                         |
| 2875                | M             | C                         | 27.8                                           | HIV                       | 109000                                         |
| 2876                | M             | C                         | 22.2                                           | Control                   | -                                              |
| 2877                | M             | C                         | 29.3                                           | HIV                       | 293000                                         |
| 3769                | F             | D                         | 54.0                                           | HIV                       | 262000                                         |
| 3795                | F             | E                         | 36.1                                           | Control                   | -                                              |
| 3797                | M             | E                         | 38.2                                           | Control                   | -                                              |
| 3801                | M             | E                         | 60.0                                           | Control                   | -                                              |
| 3762                | F             | F                         | 52.7                                           | HIV                       | 25000                                          |
| 3766                | F             | F                         | 54.8                                           | HIV                       | 26900                                          |
| 3772                | F             | G                         | 62.6                                           | HIV                       | 101000                                         |
| 3774                | M             | G                         | 51.0                                           | HIV                       | 27600                                          |

\*Each cord blood sample is used to reconstitute 2 to 6 mice.

## Supplemental Figures with Legends

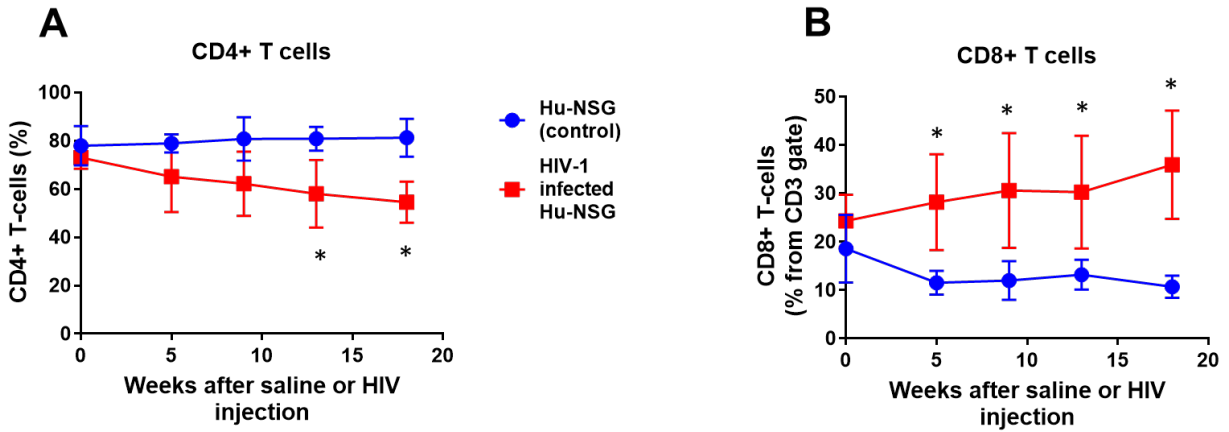

**Supplemental Fig. 1: Time-frame of observation of immune status of animals used in the study.** Graphs A and B show longitudinal CD4+ and CD8+ cell populations in peripheral blood from uninfected Hu-NSG mice and HIV-1-infected Hu-NSG mice. Data shown are mean  $\pm$  SEM for  $n = 8$  uninfected Hu-NSG mice (3 males and 5 females) and  $n = 16$  for HIV-1 infected Hu-NSG mice (4 males and 12 females). \* denote significantly different from  $t = 0$  weeks ( $p < 0.05$ ) within the group.

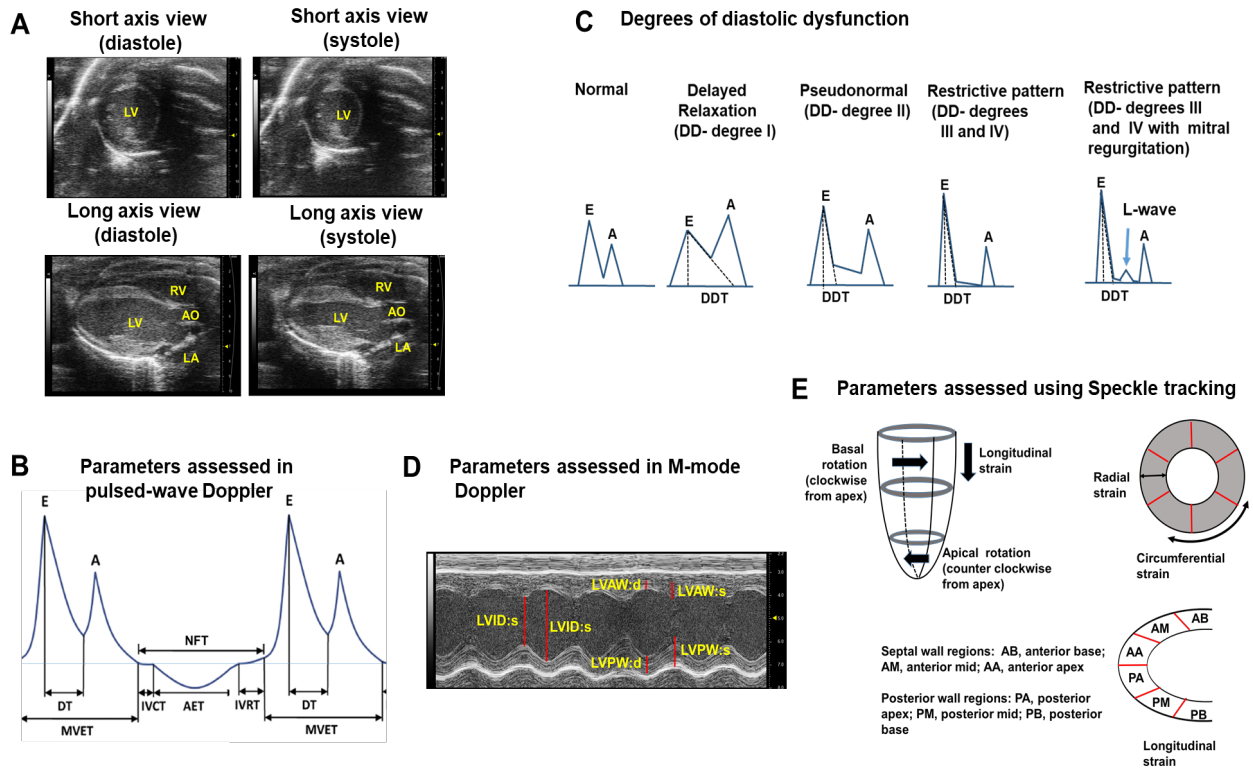

**Supplemental Fig. 2: Short and long axes view of the heart and parameters assessed in conventional and Speckle tracking echocardiography. (A)** Representative short axis (upper) and long axis (lower) echocardiographic views of the left ventricle of a mouse heart during diastole and systole. **(B)** Schematic of blood flow parameters measured using pulsed-wave Doppler echocardiography. **(C)** Schematic showing varying degrees of diastolic dysfunction including an L-wave. **(D)** Echocardiographic images showing contractile parameters measured using pulsed-wave Doppler echocardiography. **(E)** Schematic of strain parameters measured using speckle tracking echocardiography.

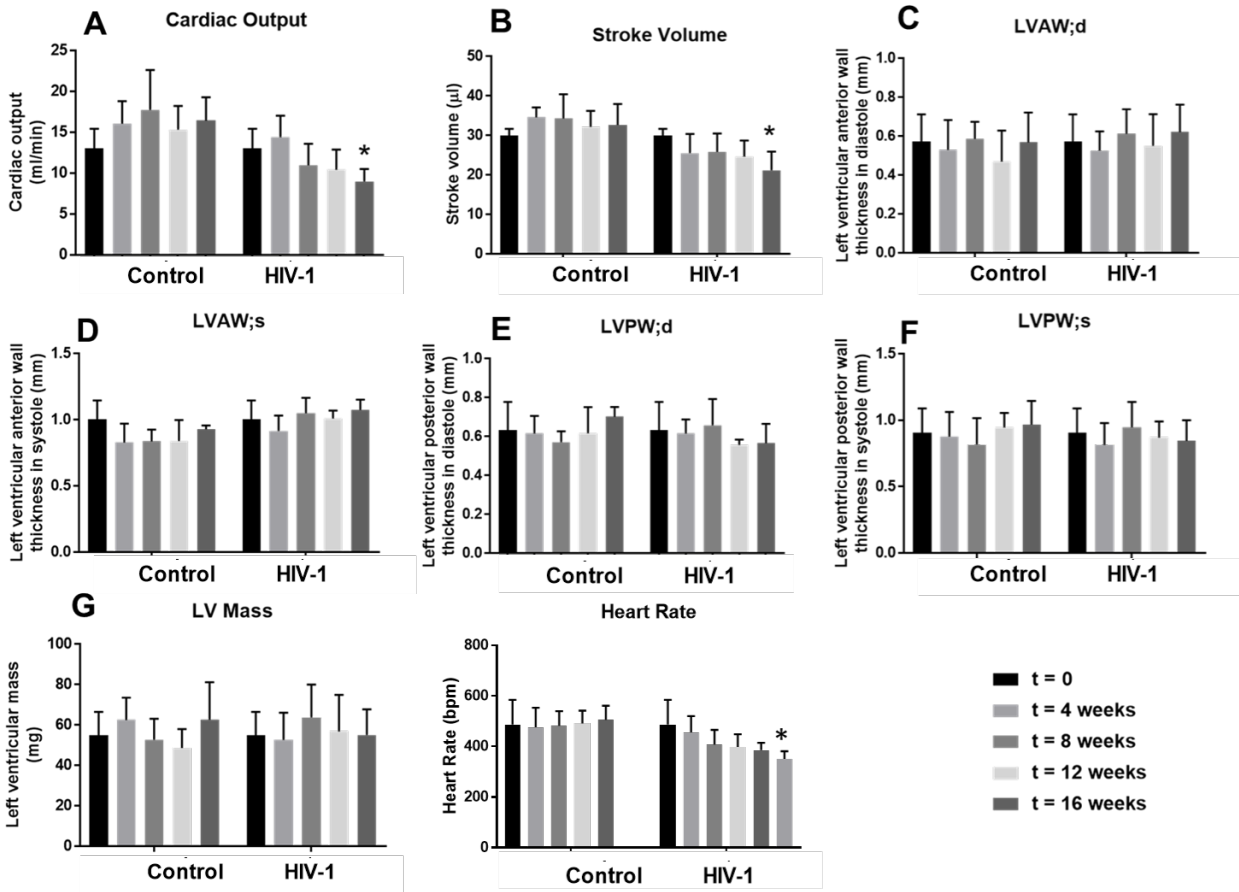

**Supplemental Fig. 3: Longitudinal changes in systolic parameters and over a 16 week period after injecting Hu-NSG mice with saline or HIV-1 virus.**

Panel A shows cardiac output; panel B, stroke volume; panel C, left ventricular anterior wall diameter at the end of diastole; panel D, left ventricular wall diameter at the end of systole; panel E, left ventricular posterior wall diameter at the end of diastole; panel F, left ventricular wall diameter at the end of systole; panel G, left ventricular mass and panel H, heart rate. Data shown are mean  $\pm$  SEM for n = 8 uninfected Hu-NSG mice (3 males and 5 females) and n = 16 for HIV-1 infected Hu-NSG mice (4 males and 12 females). \* denote significantly different from t = 0 weeks (p < 0.05) within the group.

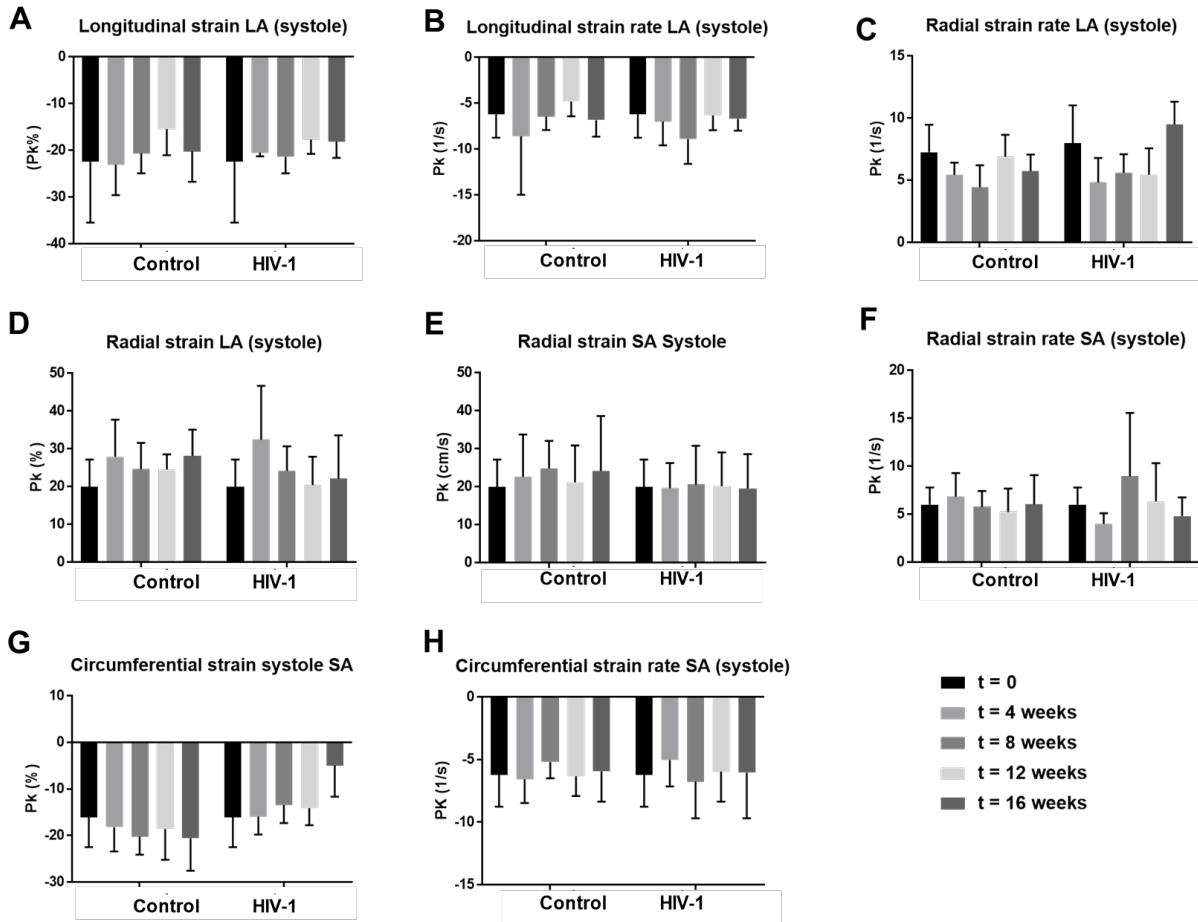

**Supplemental Fig. 4: Longitudinal changes in strain parameters over a 16 week period after injecting Hu-NSG mice with saline or HIV-1 virus.**

Panel A shows mean longitudinal strain in long axis mode; Panel B shows mean longitudinal strain rate in long axis mode; Panel C shows mean radial strain rate in long axis mode; Panel D shows mean radial strain in long axis mode; Panel E shows mean radial strain in short axis mode; Panel F shows mean radial strain rate in short axis mode; Panel G shows mean circumferential strain rate in short axis mode; Panels H shows mean circumferential strain rate in short axis mode Data shown are mean  $\pm$  SEM for  $n = 8$  uninfected Hu-NSG mice (3 males and 5 females) and  $n = 16$  for HIV-1 infected Hu-NSG mice (4 males and 12 females). \* denote significantly different from  $t = 0$  weeks ( $p < 0.05$ ) within the group.

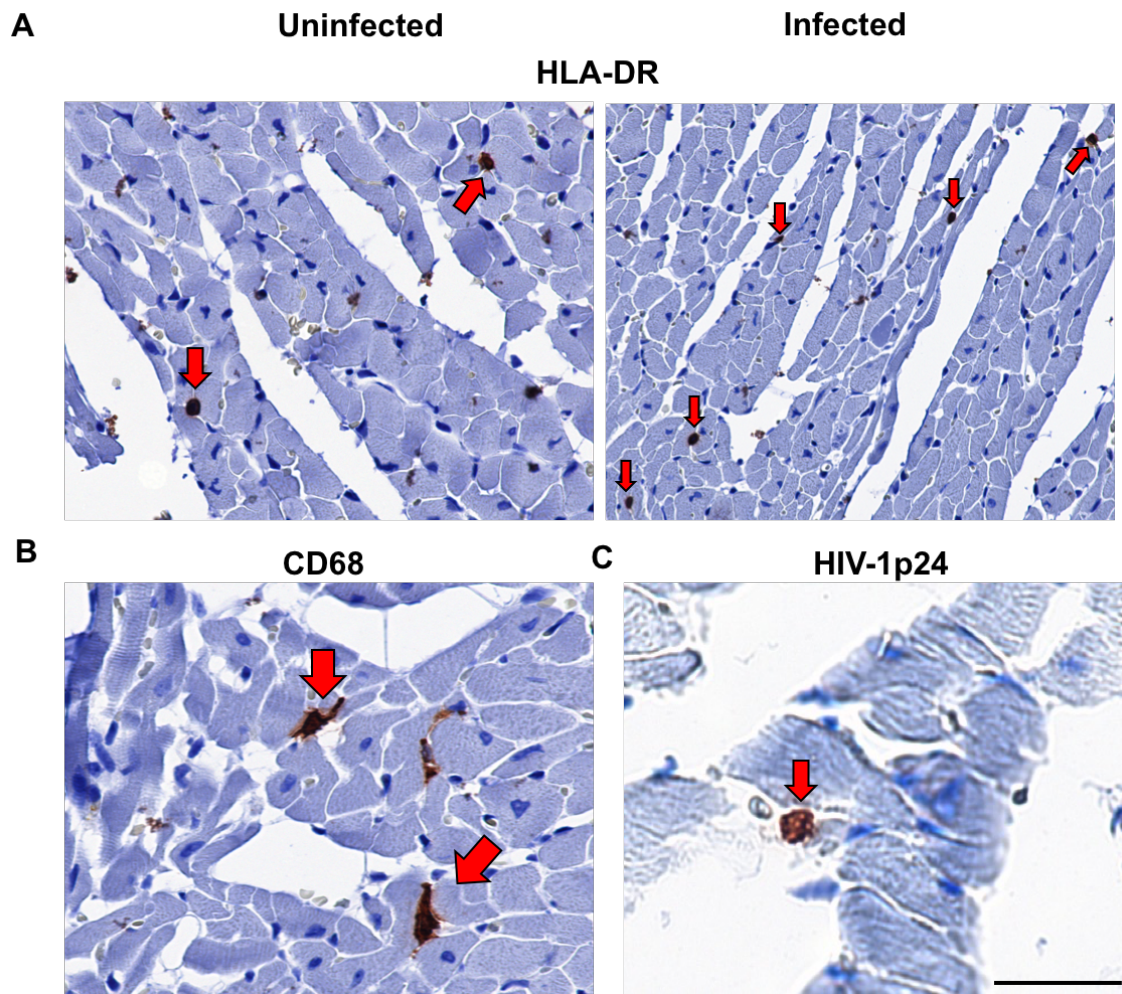

**Supplemental Fig. 5: Immunohistological analysis of cardiac tissues of Humanized mice. (A)** Representative heart regions in uninfected and HIV-1 infected animals. Paraffin sections (5 $\mu$ m) of heart were labelled with anti-HLA-DR to identify human activate cells (all positive labeling is brown). Sections were counter stained with hematoxylin. Images were captured at 20x. **(B)** Heart tissues were stained with anti-CD68 antibody to look for macrophages and the brown colored positive cells were shown by red arrows. **(C)** Presence of HIV-1 positive cells were observed by staining the tissues with anti-p24 antibodies to HIV-1. The images were captured at 40x magnification for B and C.

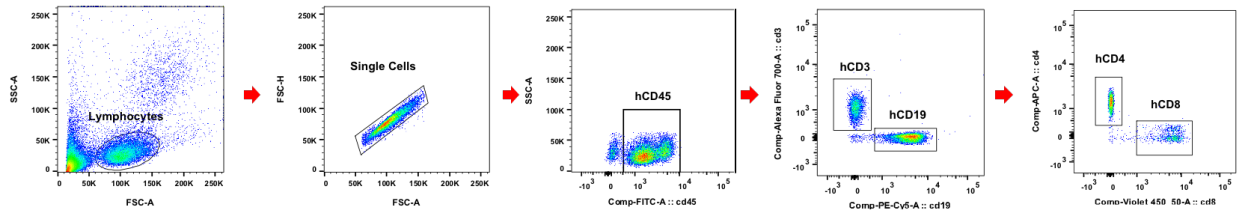

**Supplemental Fig. 6: Flow cytometric gating strategy for human cell reconstitution in NSG-humanized mice.** In brief, lymphocytes were first gated from whole blood cells by forward and side scatter analysis. Human cell (hCD45+) were then gated from total lymphocytes and single cells and subsequently grouped into human T lymphocytes (hCD3+) and B lymphocytes (hCD19+). Human CD3+ cells were then separated into human CD4+ (hCD4+) and CD8+ (hCD8+) T lymphocytes. This pattern of analysis is followed for all the time points pre- and post-HIV infection for immune cell profiling for each NSG-humanized mice.
